# Supplementary material for: Classroom Movement Breaks and Physically Active Learning Are Feasible, Reduce Sedentary Behaviour and Fatigue, and May Increase Focus in University Students: A Systematic Review and Meta-Analysis
Source: MDPI journal article supplement (doi:10.3390/ijerph19137775), 2022-06-24
Supplement: s1 [file s1]

## **Medline**

### **CONCEPT 1 Intervention**

movement break\* OR exercis\* Break\* OR active learning OR active lesson\* OR education outside of the classroom OR Acute exercise OR Acute Physical activity OR High-intensity interval activity OR High-intensity interval training OR High Intensity Interval Exercise OR Mov\* and academic learning OR brain break\* OR activ\* break\* OR Physical\* active learning OR activ\* workstation\* OR sit-to-stand desk\* OR sit-stand desk\* OR breaks in sitting time OR classroom intervention OR stationary cycl\* OR walk\* break OR breaking up prolonged sitting OR height-adjustable desk\* OR sedentary break\*

AND

### **CONCEPT 2 Population**

Tertiary OR college OR universit\* OR higher education OR higher learning OR lecture\* OR tutorial\* OR workshop\* OR lecture-based OR tutorial-based OR workshop-based

## **CINAHL**

### **CONCEPT 1 Intervention**

movement break\* OR exercis\* Break\* OR active learning OR active lesson\* OR education outside of the classroom OR Acute exercise OR Acute Physical activity OR High-intensity interval activity OR High-intensity interval training OR High Intensity Interval Exercise OR Mov\* and academic learning OR brain break\* OR activ\* break\* OR Physical\* active learning OR activ\* workstation\* OR sit-to-stand desk\* OR sit-stand desk\* OR breaks in sitting time OR classroom intervention OR stationary cycl\* OR walk\* break OR breaking up prolonged sitting OR height-adjustable desk\* OR sedentary break\*

AND

### **CONCEPT 2 Population**

Tertiary OR college OR universit\* OR higher education OR higher learning OR lecture\* OR tutorial\* OR workshop\* OR lecture-based OR tutorial-based OR workshop-based

## **Embase**

### **CONCEPT 1 Intervention**

movement break\* OR exercis\* Break\* OR active learning OR active lesson\* OR education outside of the classroom OR Acute exercise OR Acute Physical activity OR High-intensity interval activity OR High-intensity interval training OR High Intensity Interval Exercise OR Mov\* and academic learning OR brain break\* OR activ\* break\* OR Physical\* active learning OR activ\* workstation\* OR sit-to-stand desk\* OR sit-stand desk\* OR breaks in sitting time OR classroom intervention OR stationary cycl\* OR walk\* break OR breaking up prolonged sitting OR height-adjustable desk\* OR sedentary break\*

AND

CONCEPT 2 Population

Tertiary OR college OR universit\* OR higher education OR higher learning OR lecture\* OR tutorial\* OR workshop\* OR lecture-based OR tutorial-based OR workshop-based

**Psychoinfo**

CONCEPT 1 Intervention

movement break\* OR exercis\* Break\* OR active learning OR active lesson\* OR education outside of the classroom OR Acute exercise OR Acute Physical activity OR High-intensity interval activity OR High-intensity interval training OR High Intensity Interval Exercise OR Mov\* and academic learning OR brain break\* OR activ\* break\* OR Physical\* active learning OR activ\* workstation\* OR sit-to-stand desk\* OR sit-stand desk\* OR breaks in sitting time OR classroom intervention OR stationary cycl\* OR walk\* break OR breaking up prolonged sitting OR height-adjustable desk\* OR sedentary break\*

AND

CONCEPT 2 Population

Tertiary OR college OR universit\* OR higher education OR higher learning OR lecture\* OR tutorial\* OR workshop\* OR lecture-based OR tutorial-based OR workshop-based

**PUBMED**

CONCEPT 1 Intervention

“movement break\*” OR “exercise break\*” OR “brain break\*” OR “active break\*” OR “Physically active learning”

AND

CONCEPT 2 Population

Tertiary OR college OR universit\*
